# Supplementary material for: Influence of topography and human activity on apparent in situ 10 Be-derived erosion rates in Yunnan, SW China
Source: Copernicus journal article supplement (doi:10.5194/esurf-4-819-2016), 2016-11-04
Supplement: Supplementary file 1 [file esurf-4-819-2016-supplement.zip]

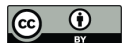

## *Supplement of*

# **Influence of topography and human activity on apparent in situ $^{10}\text{Be}$ -derived erosion rates in Yunnan, SW China**

**Amanda H. Schmidt et al.**

*Correspondence to:* Amanda H. Schmidt (aschmidt@oberlin.edu)

- esurf-4-819-2016-supplement-title-page.pdf
- Supplementary tables.xlsx

The copyright of individual parts of the supplement might differ from the CC-BY 3.0 licence.
