# Supplementary material for: Influence of topography and human activity on apparent in situ 10 Be-derived erosion rates in Yunnan, SW China
Source: Copernicus journal article supplement (doi:10.5194/esurf-4-819-2016), 2016-11-04
Supplement: Supplementary file 1 [file Supplementary tables.xlsx]

## Sheet: S1
Table S1: Sample location information for all samples collected.
Sample name	Basin	Latitude	Longitude	Elevation [m]	Area [km2]
CH-003	Yongchun	27.0549	99.3599	2657	4
CH-004	Yongchun	27.0591	99.3499	2603	6
CH-005	Yongchun	27.064	99.3514	2521	16
CH-009	Yongchun	27.0697	99.3498	2506	23
CH-010	Yongchun	27.0639	99.3584	2598	6
CH-011	Yongchun	27.0745	99.3511	2492	8
CH-012	Yongchun	27.0748	99.3519	2479	34
CH-013	Yongchun	27.1546	99.4139	3157	13
CH-016	Yongchun	27.132	99.4083	2685	18
CH-017	Yongchun	27.1312	99.4065	2626	18
CH-020	Yongchun	27.1318	99.4057	2597	37
CH-021	Yongchun	27.1176	99.354	2329	63
CH-024	Yongchun	27.1222	99.3617	2369	67
CH-031	Weiyuan	24.1338	100.778	1275	90
CH-032	Weiyuan	24.1304	100.779	1271	27
CH-033	Weiyuan	24.1301	100.781	1228	120
CH-034	Weiyuan	24.1292	100.798	1228	120
CH-035	Weiyuan	24.1294	100.8	1217	177
CH-036	Weiyuan	24.1265	100.799	1217	297
CH-037	Weiyuan	24.0603	100.808	1170	7
CH-039	Weiyuan	23.9797	100.799	1091	662
CH-041	Weiyuan	23.8578	100.814	988	923
CH-042	Weiyuan	23.8517	100.636	1408	27
CH-043	Weiyuan	23.6952	100.634	1349	17
CH-044	Weiyuan	23.5457	100.713	887	2508
CH-045	Weiyuan	23.5694	100.717	887	1877
CH-046	Weiyuan	23.8479	100.903	1160	37
CH-047	Weiyuan	23.8453	100.902	1160	91
CH-048	Weiyuan	23.8443	100.927	1264	31
CH-049	Weiyuan	23.8455	100.925	1246	20
CH-050	Weiyuan	23.726	100.83	1005	302
CH-052	Weiyuan	23.7292	100.824	952	1137
CH-053	Weiyuan	23.7206	100.825	952	1441
CH-054	Weiyuan	23.6952	100.823	992	262
CH-056	Weiyuan	23.6998	100.816	952	1445
CH-058	Weiyuan	23.6921	100.814	952	1711
CH-059	Weiyuan	23.5655	100.702	935	624
CH-062	Nankai	21.8728	100.543	1420	7
CH-063	Nankai	21.8708	100.542	1442	12
CH-064	Nankai	21.8692	100.544	1407	20
CH-065	Nankai	21.8508	100.547	1359	42
CH-066	Nankai	21.8478	100.558	1407	14
CH-067	Nankai	21.835	100.472	1198	95
CH-068	Nankai	21.8287	100.448	1198	128
CH-069	Nankai	21.7976	100.424	1218	128
CH-070	Nankai	21.7941	100.367	1217	38
CH-071	Nankai	21.9444	100.341	1127	487
CH-075	Nankai	21.9519	100.425	1060	1006
CH-077	Nankai	22.0726	100.183	1275	11
CH-078	Nankai	22.0492	100.173	1227	18
CH-079	Nankai	21.958	100.179	1281	12
CH-080	Nankai	21.8833	100.223	1244	51

## Sheet: S2
Table S2. Sample processing and accelerator mass spectrometer data for insitu and meteoric 10Be
	Insitu 10Be							Meteoric 10Be
Sample name	AMS ID	Quartz Mass (g)	9Be Carrier Mass (μg)	Blank Corrected 10Be/9Be Ratio				AMS ID	Sediment Mass (g)	9Be Carrier Mass (μg)	Blank Corrected 10Be/9Be Ratio
				x10-13		x10-15					x10-12		x10-14
CH-001	b7722	8.0863	218.527	1.0617	±	4.1083		b8221	0.501	322.636	1.12721	±	3.64239
CH-003	b7108	15.0458	247.064	4.88958	±	10.0362		b8089	0.517	323.273	2.85063	±	5.65293
CH-004	b7659	14.6584	247.635	1.32117	±	7.3752		b8092	0.512	321.682	0.946736	±	3.15687
CH-005	b7691	12.0404	219.705	2.13306	±	6.51898		b8093	0.498	322.955	0.95957	±	6.60891
CH-009	b7708	10.0041	221.964	1.87359	±	6.98826		b8094	0.5	322	2.18382	±	12.4906
CH-010	b7709	15.035	221.868	4.90353	±	9.45323		b8095	0.503	323.273	15.8724	±	14.1667
CH-011	b7677	7.1035	248.562	0.36699	±	2.07856		b8096	0.503	322	0.674711	±	5.65293
CH-012	b7678	13.563	248.384	1.20399	±	3.46171		b8181	0.493	321.045	0.629211	±	3.01945
CH-013	b7695	10.0197	220.627	11.3735	±	14.6246		b8099	0.497	322	6.96449	±	17.3956
CH-016	b7696	9.9863	222.377	10.8853	±	14.1235		b8100	0.505	322.955	6.72985	±	38.0418
CH-017	b7698	19.9853	221.614	7.71585	±	23.6237		b8101	0.511	322	3.08694	±	32.1121
CH-020	b7702	15.7305	220.245	7.0881	±	11.2585		b8102	0.502	322.955	2.62241	±	11.5323
CH-021	b7703	14.0381	221.105	3.22674	±	6.98826		b8105	0.496	322.318	1.47265	±	11.6143
CH-023	b7705	19.4988	223.236	12.3807	±	15.2092		b8106	0.495	322.318	2.88272	±	12.4357
CH-024	b7710	19.8666	222.123	13.8064	±	16.6016		b8109	0.503	321.682	3.16227	±	16.373
CH-031	b7109	16.2639	250.845	0.699	±	2.85992		b8182	0.509	322.318	0.469211	±	3.29912
CH-032	b7110	15.2526	244.388	0.46185	±	2.25267		b8183	0.511	324.545	0.237211	±	2.49303
CH-033	b7111	19.9705	246.529	0.87477	±	3.22167		b8184	0.517	319.455	0.249211	±	2.78356
CH-034	b7116	20.3773	248.277	0.71853	±	2.88352		b8187	0.515	322.318	0.248211	±	2.79481
CH-035	b7729	20.4769	220.118	1.12029	±	3.51527		b8188	0.501	320.409	0.245211	±	2.52091
CH-036	b7117	17.6238	248.384	0.61251	±	3.3015		b8189	0.495	321.682	0.223211	±	2.44516
CH-037	b7711	19.9085	223.077	1.24584	±	5.00724		b8190	0.508	320.409	0.529211	±	2.6565
CH-039	b7118	19.0822	248.312	0.93615	±	3.46171		b8191	0.498	320.727	0.180211	±	2.63685
CH-041	b7712	18.218	221.645	0.65157	±	2.78404		b8193	0.508	322.955	0.133211	±	2.46018
CH-042	b7119	20.0868	248.705	1.96566	±	4.81587		b8194	0.506	322.636	0.395211	±	2.96212
CH-043	b7121	20.0127	248.241	1.92939	±	4.46137		b8195	0.496	325.818	0.309211	±	2.47625
CH-044	b7730	17.5678	220.436	0.96126	±	3.16856		b8222	0.509	323.273	0.156211	±	3.55029
CH-045	b7665	19.9965	247.742	0.73527	±	3.56889		b8196	0.515	322	0.251211	±	2.90646
CH-046	b7666	13.577	248.312	0.68505	±	2.74752
CH-047	b7667	14.6386	248.348	0.69621	±	2.62543		b8223	0.495	322	0.246211	±	2.76134
CH-048	b7669	17.9403	248.74	1.15935	±	3.3015		b8226	0.509	322	0.387211	±	4.48744
CH-049	b7683	15.4595	248.419	0.84408	±	3.00981		b8227	0.499	322	0.340211	±	2.94338
CH-050	b7684	13.7259	247.742	0.59856	±	2.6332		b8228	0.501	319.773	0.240211	±	2.55004
CH-052	b7122	17.3697	248.134	0.72411	±	2.81541		b8229	0.505	324.227	0.151211	±	3.19354
CH-053	b7671	20.0337	248.491	0.7548	±	2.94132		b8230	0.51	322	0.389211	±	9.30025
CH-054	b7717	19.1033	222.091	0.89151	±	2.95185		b8232	0.491	320.409	0.268211	±	2.93717
CH-056	b7672	19.9697	248.205	0.69621	±	3.03621		b8233	0.508	322.318	0.175211	±	2.6766
CH-058	b7685	19.9796	247.777	0.8106	±	2.88615
CH-059	b7673	20.0286	249.846	1.29327	±	3.64944		b8234	0.51	322.636	0.147211	±	2.64662
CH-062	b7125	14.9151	247.635	1.49136	±	4.08121		b8315	0.502	322.955	0.480806	±	2.60789
CH-063	b7129	16.8296	247.421	1.72572	±	4.43415		b8317	0.496	321.364	0.398222	±	2.83271
CH-064	b7130	22.5964	247.456	2.46228	±	6.05049		b8318	0.497	323.273	0.288575	±	2.47623
CH-065	b7131	15.4863	248.598	1.25979	±	3.91891		b8235	0.507	322.955	0.390211	±	2.87628
CH-066	b7133	18.836	248.598	2.36742	±	5.0346		b8236	0.511	320.409	0.535211	±	4.72985
CH-067	b7135	19.6074	247.385	1.13982	±	3.48848		b8239	0.512	322.955	0.382211	±	2.58073
CH-068	b7136	15.2826	248.847	1.16214	±	3.8919		b8240	0.501	323.591	1.11721	±	3.24237
CH-069	b7137	19.2829	248.384	1.53321	±	4.78855		b8321	0.497	322	0.56339	±	2.6619
CH-070	b7138	20.2506	248.883	1.44393	±	6.29841		b8322	0.507	320.727	0.593522	±	2.73581
CH-071	b7139	16.4767	249.525	1.70619	±	5.52806		b8323	0.508	322.318	0.971288	±	3.00522
CH-075	b7735	20.0034	221.327	2.04099	±	4.73395		b8324	0.504	322.318	1.42076	±	3.32541
CH-077	b7689	20.0259	248.491	4.49061	±	9.36999		b8161	0.496	321.111	0.649211	±	2.77796
CH-078	b7690	20.0043	250.096	2.97006	±	7.2646		b8162	0.5	328.15	0.265211	±	2.43148
CH-079	b7719	9.7717	221.232	1.16493	±	5.69289		b8164	0.511	328.962	1.19721	±	3.07834
CH-080	b7721	20.0181	222.345	2.55993	±	6.32597		b8165	0.509	328.962	1.54721	±	2.9874

## Sheet: S3
Table S3. Data for all samples as entered into CRONUS-Earth online calculatora
Sample name	Mean	Mean	Effective Elevation (m)	Elv/pressure	Thickness	Density	Shielding	10Be	+/-	10Be Standard	26Al	+/-	26Al Standard
	Latitude	Longitude		flag	(cm)	(g cm3)	Correction	(atoms g-1)	(atoms g-1)		(atoms g-1)	(atoms g-1)
CH001	27.115	99.356	2956	std	0.1	2.7	1	192000	7420	NIST_27900	0	0	KNSTD
CH003	27.049	99.384	3115	std	0.1	2.7	1	537000	11000	NIST_27900	0	0	KNSTD
CH004	27.055	99.329	2988	std	0.1	2.7	1	149000	8330	NIST_27900	0	0	KNSTD
CH005	27.057	99.372	2975	std	0.1	2.7	1	260000	7950	NIST_27900	0	0	KNSTD
CH009	27.056	99.359	2962	std	0.1	2.7	1	278000	10400	NIST_27900	0	0	KNSTD
CH010	27.061	99.375	3059	std	0.1	2.7	1	484000	9320	NIST_27900	0	0	KNSTD
CH011	27.069	99.322	2961	std	0.1	2.7	1	85800	4860	NIST_27900	0	0	KNSTD
CH012	27.062	99.351	2942	std	0.1	2.7	1	147000	4240	NIST_27900	0	0	KNSTD
CH013	27.175	99.407	3297	std	0.1	2.7	1	1670000	21500	NIST_27900	0	0	KNSTD
CH016	27.163	99.409	3268	std	0.1	2.7	1	1620000	21000	NIST_27900	0	0	KNSTD
CH017	27.127	99.431	3195	std	0.1	2.7	1	572000	17500	NIST_27900	0	0	KNSTD
CH020	27.153	99.422	3224	std	0.1	2.7	1	663000	10500	NIST_27900	0	0	KNSTD
CH021	27.077	99.353	2895	std	0.1	2.7	1	340000	7360	NIST_27900	0	0	KNSTD
CH023	27.115	99.377	2968	std	0.1	2.7	1	947000	11600	NIST_27900	0	0	KNSTD
CH024	27.141	99.401	3045	std	0.1	2.7	1	1030000	12400	NIST_27900	0	0	KNSTD
CH031	24.192	100.74	1818	std	0.1	2.7	1	72100	2950	NIST_27900	0	0	KNSTD
CH032	24.115	100.74	1841	std	0.1	2.7	1	49500	2410	NIST_27900	0	0	KNSTD
CH033	24.184	100.75	1814	std	0.1	2.7	1	72200	2660	NIST_27900	0	0	KNSTD
CH034	24.184	100.75	1814	std	0.1	2.7	1	58500	2350	NIST_27900	0	0	KNSTD
CH035	24.261	100.81	1867	std	0.1	2.7	1	80500	2530	NIST_27900	0	0	KNSTD
CH036	24.247	100.79	1845	std	0.1	2.7	1	57700	3110	NIST_27900	0	0	KNSTD
CH037	24.082	100.84	1415	std	0.1	2.7	1	93300	3750	NIST_27900	0	0	KNSTD
CH039	24.177	100.81	1729	std	0.1	2.7	1	81400	3010	NIST_27900	0	0	KNSTD
CH041	24.106	100.81	1682	std	0.1	2.7	1	53000	2260	NIST_27900	0	0	KNSTD
CH042	23.875	100.6	1836	std	0.1	2.7	1	163000	3990	NIST_27900	0	0	KNSTD
CH043	23.676	100.6	1762	std	0.1	2.7	1	160000	3700	NIST_27900	0	0	KNSTD
CH044	23.978	100.8	1657	std	0.1	2.7	1	80600	2660	NIST_27900	0	0	KNSTD
CH045	23.992	100.85	1645	std	0.1	2.7	1	60900	2960	NIST_27900	0	0	KNSTD
CH046	23.898	100.93	1654	std	0.1	2.7	1	83700	3360	NIST_27900	0	0	KNSTD
CH047	23.894	100.96	1735	std	0.1	2.7	1	78900	2980	NIST_27900	0	0	KNSTD
CH048	23.852	100.97	1864	std	0.1	2.7	1	107000	3060	NIST_27900	0	0	KNSTD
CH049	23.877	100.95	1724	std	0.1	2.7	1	90600	3230	NIST_27900	0	0	KNSTD
CH050	23.83	100.92	1631	std	0.1	2.7	1	72200	3180	NIST_27900	0	0	KNSTD
CH052	24.051	100.81	1667	std	0.1	2.7	1	69100	2690	NIST_27900	0	0	KNSTD
CH053	24.063	100.84	1658	std	0.1	2.7	1	62600	2440	NIST_27900	0	0	KNSTD
CH054	23.683	100.92	1728	std	0.1	2.7	1	69300	2290	NIST_27900	0	0	KNSTD
CH056	24.063	100.84	1658	std	0.1	2.7	1	57800	2520	NIST_27900	0	0	KNSTD
CH058	23.996	100.85	1668	std	0.1	2.7	1	67200	2390	NIST_27900	0	0	KNSTD
CH059	23.797	100.65	1699	std	0.1	2.7	1	108000	3040	NIST_27900	0	0	KNSTD
CH062	21.891	100.53	1640	std	0.1	2.7	1	165000	4530	NIST_27900	0	0	KNSTD
CH063	21.892	100.52	1681	std	0.1	2.7	1	170000	4360	NIST_27900	0	0	KNSTD
CH064	21.889	100.52	1656	std	0.1	2.7	1	180000	4430	NIST_27900	0	0	KNSTD
CH065	21.86	100.54	1657	std	0.1	2.7	1	135000	4200	NIST_27900	0	0	KNSTD
CH066	21.83	100.57	1732	std	0.1	2.7	1	209000	4440	NIST_27900	0	0	KNSTD
CH067	21.861	100.53	1599	std	0.1	2.7	1	96100	2940	NIST_27900	0	0	KNSTD
CH068	21.861	100.52	1562	std	0.1	2.7	1	126000	4240	NIST_27900	0	0	KNSTD
CH069	21.747	100.45	1655	std	0.1	2.7	1	132000	4120	NIST_27900	0	0	KNSTD
CH070	21.759	100.36	1560	std	0.1	2.7	1	119000	5170	NIST_27900	0	0	KNSTD
CH071	21.818	100.44	1510	std	0.1	2.7	1	173000	5590	NIST_27900	0	0	KNSTD
CH075	21.919	100.36	1448	std	0.1	2.7	1	151000	3500	NIST_27900	0	0	KNSTD
CH077	22.086	100.18	1644	std	0.1	2.7	1	372000	7770	NIST_27900	0	0	KNSTD
CH078	22.035	100.15	1546	std	0.1	2.7	1	248000	6070	NIST_27900	0	0	KNSTD
CH079	21.951	100.17	1600	std	0.1	2.7	1	176000	8610	NIST_27900	0	0	KNSTD
CH080	21.874	100.18	1711	std	0.1	2.7	1	190000	4700	NIST_27900	0	0	KNSTD
aFor more information about required input for CRONUS see the CRONUS documentation at http://hess.ess.washington.edu/

## Sheet: S4
Table S4. Summary of physiographic characteristics, isotopic results, interpreted values, and land-use for each sample
									Catchment ksn						Land-use (percent of total area)1
Sample ID	Mean Lattitude	Mean Longitude	Nesting Order	Mean Elevation (m)	Mean Slope (o)	Basin Area (km2)	MAP (mm/yr)	Basin Relief (m)	Mean	Standard Deviation	Median	Erosion Rate (mm/kyr)			Cultivated	Forest	Grassland	Shrubland	Wetland	Water	Artificial
Yongchun
CH-003	27.049	99.384	0	3104	21.0865	4	869.282	870	113.626	23.3602	112.438	35.21	±	2.86	8.97899	80.259	0.530673	10.2314	0	0	0
CH-004	27.055	99.329	0	2979	22.0343	6	869.282	812	89.9435	17.2163	84.5964	121.54	±	11.52	7.02278	78.7431	3.09505	11.139	0	0	0
CH-005	27.057	99.372	1	2962	20.1095	16	869.282	1006	99.5073	36.7814	95.0942	68.61	±	5.68	14.0822	65.2476	4.26284	16.4074	0	0	0
CH-009	27.056	99.359	2	2949	20.466	23	869.282	1021	102.011	39.67	94.4991	63.65	±	5.46	13.765	67.9482	3.8719	14.4149	0	0	0
CH-010	27.061	99.375	0	3049	22.2594	6	869.282	813	109.063	37.5246	102.124	38.03	±	3.07	5.23435	70.9514	5.09402	18.7202	0	0	0
CH-011	27.069	99.322	0	2945	21.9011	8	869.282	1086	104.367	24.3808	98.9752	209.29	±	19.82	13.107	72.2282	4.36184	10.303	0	0	0
CH-012	27.062	99.351	3	2928	20.8528	34	869.282	1099	94.1777	39.0032	88.5684	120.29	±	9.79	13.4937	69.8532	3.99989	12.6532	0	0	0
CH-013	27.175	99.407	0	3296	11.9754	13	869.282	321	32.8039	15.2584	33.2807	12.02	±	1	10.2953	38.4295	24.0604	27.2148	0	0	0
CH-016	27.163	99.409	1	3265	14.0894	18	869.282	793	167.551	182.755	60.7005	12.21	±	1.02	7.64541	43.5321	21.6677	27.1547	0	0	0
CH-017	27.127	99.431	0	3191	18.0312	18	869.282	823	148.324	125.092	135.41	34.46	±	2.92	5.62916	47.7793	11.304	35.2875	0	0	0
CH-020	27.153	99.422	2	3220	16.2056	37	869.282	881	177.065	165.337	119.057	30.09	±	2.43	6.66699	45.8533	16.3012	31.1786	0	0	0
CH-021	27.077	99.353	4	2878	20.1746	63	869.282	1249	112.502	61.8591	95.8145	50.04	±	4.01	14.2728	69.2593	3.72858	12.6559	0	0	0.0834328
CH-024	27.141	99.401	3	3026	17.9897	67	869.282	1109	149.563	117.998	112.467	17.34	±	1.41	14.2025	53.2126	10.6291	21.9557	0	0	0
Weiyuan
CH-031	24.192	100.74	0	1804	22.8954	90	989.356	1142	100.442	42.0492	98.6949	129.91	±	10.5	38.3499	61.6501	0	0	0	0	0
CH-032	24.115	100.74	0	1823	22.5555	27	988.94	1144	109.011	27.3497	113.25	192.58	±	16.33	23.2902	76.7098	0	0	0	0	0
CH-033	24.184	100.75	1	1799	22.7953	120	989.256	1189	109.415	48.7113	102.594	129.43	±	10.2	34.1466	65.8534	0	0	0	0	0
CH-034	24.184	100.75	1	1799	22.7953	120	989.256	1189	109.415	48.7113	102.594	160.34	±	12.85	34.1466	65.8534	0	0	0	0	0
CH-035	24.261	100.81	0	1831	17.942	177	992.895	1676	138.205	86.1332	123.692	119.41	±	9.17	20.0492	79.5009	0.0932403	0	0	0.356657	0
CH-036	24.247	100.79	2	1817	19.8856	297	991.495	1676	126.155	75.2021	110.572	165.55	±	14.59	25.7578	73.9744	0.0555053	0	0	0.212316	0
CH-037	24.082	100.84	0	1398	13.9572	7	988.94	1058	51.6009	15.5695	51.0773	79.63	±	6.29	35.0049	64.9951	0	0	0	0	0
CH-039	24.177	100.81	3	1698	19.0605	662	989.213	1802	107.955	69.2407	93.379	109.27	±	8.59	25.7087	74.0694	0.0248925	0	0	0.123102	0.0739974
CH-041	24.106	100.81	4	1649	18.8229	923	1000.02	1905	112.066	89.4045	94.7024	164.76	±	13.29	25.1181	74.6292	0.0178541	0	0	0.13493	0.100002
CH-042	23.875	100.6	0	1828	17.9433	27	1084	809	85.1078	31.382	84.9014	56.54	±	4.26	13.4497	86.5503	0	0	0	0	0
CH-043	23.676	100.6	0	1755	20.1423	17	1141.27	784	83.7284	26.5738	72.0638	55.09	±	4.1	6.34978	93.6502	0	0	0	0	0
CH-044	23.978	100.8	10	1629	18.9665	2508	1050.22	2006	178.617	261.689	103.094	105.73	±	8.08	22.4139	77.3146	0.00699972	0.00664076	0.0110201	0.174383	0.0724741
CH-045	23.992	100.85	9	1613	19.7929	1877	1037.77	2006	147.008	190.27	103.067	139.91	±	11.76	23.3618	76.4147	0.00935218	0.00887258	0	0.133328	0.0719398
CH-046	23.898	100.93	0	1633	19.8787	37	1030.21	1088	95.8935	44.261	87.9852	101.43	±	8.1	26.446	72.3014	0	0	0	1.25261	0
CH-047	23.894	100.96	1	1714	20.2013	91	1022.16	1246	104.196	51.8956	92.322	112.69	±	8.89	22.4728	76.9012	0.00988816	0.106792	0	0.50924	0
CH-048	23.852	100.97	0	1849	19.9546	31	1017.47	1142	121.164	59.9704	100.701	88.55	±	6.73	20.3542	79.3071	0.0287043	0.310006	0	0	0
CH-049	23.877	100.95	0	1711	22.1458	20	1017.47	921	100.422	53.0527	79.2639	97.2	±	7.59	11.1749	88.8251	0	0	0	0	0
CH-050	23.83	100.92	2	1604	20.3244	302	1030.46	1433	125.731	98.0266	96.3183	116.39	±	9.49	24.1409	75.5335	0.00358116	0.0471519	0	0.153691	0.121163
CH-052	24.051	100.81	5	1635	18.9931	1137	1009	1941	143.302	201.491	102.111	124.59	±	9.84	24.4465	75.3317	0.0144913	0	0	0.126146	0.0811672
CH-053	24.063	100.84	6	1627	19.2763	1441	1013.72	1941	140.202	186.992	100.067	137.16	±	10.82	24.3859	75.3694	0.0121817	0.0098703	0	0.133312	0.0893949
CH-054	23.683	100.92	0	1699	22.5695	262	1103.59	1648	125.57	69.6665	109.811	127.72	±	9.77	18.1134	81.8536	0	0.00926676	0	0	0.0236817
CH-056	24.063	100.84	7	1626	19.2852	1445	1014.1	1941	140.202	186.992	100.067	148.78	±	12.08	24.3926	75.3611	0.0121438	0.00983963	0	0.135139	0.0891171
CH-058	23.996	100.85	8	1636	19.7921	1711	1028.47	1941	138.08	172.855	102.682	128.15	±	9.91	23.4426	76.3427	0.010257	0.00973103	0	0.115826	0.0789002
CH-059	23.797	100.65	1	1681	16.567	624	1087.72	1591	248.192	337.7	103.14	79.91	±	6	19.064	80.5296	0	0	0.0442919	0.287248	0.0748778
Nankai
CH-062	21.891	100.53	0	1634	15.5932	7	1283.27	577	52.8413	28.0771	52.6513	48.34	±	3.64	24.7678	47.3684	27.7292	0.134608	0	0	0
CH-063	21.892	100.52	0	1678	14.8794	12	1283.27	470	48.1428	21.3184	51.0479	47.97	±	3.59	51.8775	36.6069	11.28	0.235634	0	0	0
CH-064	21.889	100.52	1	1652	14.9866	20	1283.27	590	52.874	26.6979	53.2839	44.56	±	3.32	43.9855	38.792	17.0339	0.188601	0	0	0
CH-065	21.86	100.54	2	1651	15.1805	42	1283.27	772	63.1119	32.0917	59.4979	60.08	±	4.58	33.8594	44.7879	20.8742	0.441644	0	0.0368037	0
CH-066	21.83	100.57	0	1727	16.0907	14	1283.27	724	77.8953	30.271	77.9304	39.79	±	2.95	4.89344	64.6522	29.3482	0.999938	0	0.106243	0
CH-067	21.861	100.53	3	1593	15.486	95	1283.27	933	67.1541	35.1195	63.7746	82.62	±	6.19	36.1283	34.2819	28.4658	1.10783	0	0.0161797	0
CH-068	21.861	100.52	4	1554	15.2048	128	1283.27	933	64.2771	34.2	58.6112	61.16	±	4.7	32.5624	34.611	31.5169	1.24202	0	0.0119764	0.055655
CH-069	21.747	100.45	0	1651	16.1823	128	1281.61	853	124.569	131.412	69.889	61.31	±	4.67	13.1043	44.2754	37.4195	4.18285	0	1.01796	0
CH-070	21.759	100.36	0	1553	16.3104	38	1297.48	842	68.1337	28.8771	65.8162	64.71	±	5.28	29.209	36.7349	32.9994	1.05672	0	0	0
CH-071	21.818	100.44	5	1499	14.4352	487	1289.3	1004	80.0202	84.6584	57.111	42.65	±	3.28	37.8513	33.4174	25.6143	2.22331	0	0.316217	0.577392
CH-075	21.919	100.36	6	1435	13.4878	1006	1299.22	1179	84.095	146.963	52.6981	47.53	±	3.45	47.6343	35.1872	14.4694	1.26455	0	0.589301	0.855211
CH-077	22.086	100.18	0	1633	16.421	11	1325.04	874	79.3374	13.0289	80.0552	20.69	±	1.58	56.0129	43.979	0	0.00808734	0	0	0
CH-078	22.035	100.15	0	1535	15.7993	18	1328.58	898	61.785	18.499	59.4686	29.94	±	2.25	52.2333	47.7364	0	0.0303505	0	0	0
CH-079	21.951	100.17	0	1591	19.2905	12	1295.86	692	71.4792	22.1689	72.023	44.21	±	3.8	52.5779	47.3625	0	0.0596036	0	0	0
CH-080	21.874	100.18	0	1697	19.0018	51	1296.84	995	86.3227	40.0925	85.1455	43.44	±	3.26	32.9537	56.4838	9.14211	0.132828	0	1.28755	0
1 Land-use reported from values calulcated from GLC30 land cover dataset [Chen et al., 2014]

## Sheet: S5
Table S5a: Erosion rate as a function of single topographic parameters. All regressions are simple linear models.
Basin	Topographic parameter	degrees of freedom	R2	Slope	Intercept	p
All	Slope	52	0.367276	10.6668	-113.769	1.19674e-06
All	Relief	52	0.394008	0.0700937	2.88827	3.77248e-07
All	Median Ksn	52	0.182543	0.929439	2.363	0.00127225
All	Agriculture	52	0.000367181	-0.0702305	85.6397	0.890613
All	MAP	52	0.0634798	-0.0752156	163.423	0.0660752
All	Forest	52	0.310911	1.62977	-18.6939	1.18673e-05
All	Grass/shrubland	52	0.341624	-1.82273	107.744	3.47573e-06
Yongchun	Slope	13	0.357139	10.9437	-147.126	0.0186365
Yongchun	Relief	13	0.0923663	0.0523463	9.46971	0.270781
Yongchun	Median Ksn	13	0.00612795	0.173487	44.7167	0.781546
Yongchun	Agriculture	13	0.0534859	3.49599	23.3105	0.406917
Yongchun	Forest	13	0.320446	2.36993	-84.7706	0.0278229
Yongchun	Grass/shrubland	13	0.353249	-2.29058	123.837	0.0194607
Yongchun	MAP	13	NA - all basins have same MAP
Weiyuan	Slope	22	0.20649	7.28222	-24.9765	0.0256971
Weiyuan	Relief	22	0.204397	0.0370817	65.2507	0.026554
Weiyuan	Median Ksn	22	0.359515	1.38679	-14.9093	0.0019567
Weiyuan	Agriculture	22	0.212833	2.13739	69.7942	0.0232594
Weiyuan	MAP	22	0.347724	-0.485286	617.166	0.00242445
Weiyuan	Forest	22	0.210044	-2.11552	280.975	0.0243025
Weiyuan	Grass/shrubland	22	NA - no basins have grass/shrubland
Nankai	Slope	13	0.026979	-1.6133	74.974	0.558577
Nankai	Relief	13	0.00546978	0.00592997	44.4565	0.793363
Nankai	Median Ksn	13	0.0547067	-0.323465	70.0136	0.401462
Nankai	Agriculture	13	0.13852	-0.376641	63.1686	0.171911
Nankai	MAP	13	0.426841	-0.645949	884.546	0.00826209
Nankai	Forest	13	0.180693	-0.716425	80.1874	0.11422
Nankai	Grass/shrubland	13	0.464934	0.759069	34.3544	0.00511185
Weiyuan, Nankai	MAP	37	0.72	-0.28	404.84	1.18e-11
Table S5a: Erosion rate as a function of multiple topographic parameters mentioned in the text. All regressions are simple linear models.
						Variable 1		Variable 2		Variable 3		Intercept
Watershed	Variable 1	Variable 2	Variable 3	degrees of freedom	R2	Slope	p	slope	p	slope	p	Intercept	p
All	Slope	Relief	Median Ksn	50	0.610076	11.1386	3.86616e-06	0.0675693	9.84547e-07	-0.780352	0.0130435	-132.162	4.61745e-05
Weiyuan	Slope	Relief		21	0.507613	8.98921	0.00169916	0.0458486	0.00174991			-126.162	0.0367405
Weiyuan	Slope	Relief	Median Ksn	20	0.524398	7.45197	0.0265537	0.0365189	0.044239	0.431256	0.410755	-123.788	0.0421726
Weiyuan	Slope	Relief	Agriculture	20	0.623913	8.37368	0.0013592	0.0410851	0.00207067	1.60692	0.0218348	-144.441	0.0105274

## Sheet: S6
Table S6a: Independent parameters in Figure 6 and table S5 as a function of one another.
Watershed	Variable 1	Variable 2	degrees of freedom	R2	Slope	Intercept	p
All	Slope	Relief	52	0.132388	0.00230841	15.8682	0.00683924
All	Slope	Median Ksn	52	0.474001	0.0850922	11.0665	8.73086e-09
All	Slope	Agriculture	52	0.0877238	-0.0616746	19.9951	0.0296596
All	Slope	MAP	52	0.243432	-0.00836836	27.3774	0.000150138
All	Slope	Forest	52	0.520705	0.11983	10.9896	7.44917e-10
All	Slope	Grass/shrubland	52	0.266414	-0.0914509	19.7311	6.46946e-05
All	Relief	Median Ksn	52	0.335096	11.2771	166.632	4.5316e-06
All	Relief	Agriculture	52	0.00232234	-1.58169	1194.27	0.729311
All	Relief	MAP	52	0.0703339	-0.708999	1905.76	0.0526094
All	Relief	Forest	52	0.274069	13.7029	293.646	4.8637e-05
All	Relief	Grass/shrubland	52	0.276507	-14.685	1348.37	4.43891e-05
All	Median Ksn	Agriculture	52	0.18353	-0.721773	104.857	0.00123009
All	Median Ksn	MAP	52	0.368041	-0.083253	175.745	1.15857e-06
All	Median Ksn	Forest	52	0.342721	0.786575	38.2606	3.3234e-06
All	Median Ksn	Grass/shrubland	52	0.0664262	-0.36947	92.6316	0.0598972
All	Agriculture	MAP	52	0.460051	0.0552468	-34.7397	1.74838e-08
All	Agriculture	Forest	52	0.229218	-0.38181	47.6651	0.000250088
All	Agriculture	Grass/shrubland	52	0.118292	-0.292644	27.4263	0.0108817
All	MAP	Forest	52	0.241105	-4.80752	1359.06	0.0001633
All	MAP	Grass/shrubland	52	0.00363371	-0.629698	1064.39	0.665017
All	Forest	Grass/shrubland	52	0.434093	-0.70296	72.1645	6.08839e-08
Yongchun	Slope	Relief	13	0.211769	0.00432828	14.7618	0.084337
Yongchun	Slope	Median Ksn	13	0.255528	0.0611762	13.1367	0.0545741
Yongchun	Slope	Agriculture	13	0.0227301	0.124453	17.706	0.591726
Yongchun	Slope	Shrub	13	0.559942	-0.280466	24.302	0.00133281
Yongchun	Slope	Forest	13	0.867258	0.212906	5.92327	4.60013e-07
Yongchun	Slope	Grass/shrubland	13	0.80765	-0.189134	24.2111	5.2837e-06
Yongchun	Relief	Median Ksn	13	0.299091	7.0369	312.49	0.0348809
Yongchun	Relief	Agriculture	13	0.424344	57.1716	369.523	0.0085181
Yongchun	Relief	Shrub	13	0.180073	-16.9102	1310.26	0.11491
Yongchun	Relief	Forest	13	0.112831	8.16476	490.562	0.220936
Yongchun	Relief	Grass/shrubland	13	0.220364	-10.5038	1280.3	0.0774962
Yongchun	Median Ksn	Agriculture	13	5.12575e-05	0.0488338	96.3994	0.979797
Yongchun	Median Ksn	Shrub	13	0.000178024	0.0413223	96.162	0.962359
Yongchun	Median Ksn	Forest	13	0.0702039	0.500531	66.0339	0.339897
Yongchun	Median Ksn	Grass/shrubland	13	0.0576189	-0.417425	108.287	0.388843
Yongchun	Agriculture	Shrub	13	0.239895	-0.222389	15.0846	0.0638445
Yongchun	Agriculture	Forest	13	0.0261115	0.0447532	8.17057	0.565057
Yongchun	Agriculture	Grass/shrubland	13	0.1711	-0.105458	13.8018	0.125362
Yongchun	Shrub	Forest	13	0.792866	-0.543132	52.196	8.61697e-06
Yongchun	Shrub	Grass/shrubland	13	0.905781	0.534395	4.13114	4.86469e-08
Yongchun	Forest	Grass/shrubland	13	0.930551	-0.888005	85.8871	6.62163e-09
Weiyuan	Slope	Relief	22	0.03631	-0.000975264	21.2937	0.372453
Weiyuan	Slope	Median Ksn	22	0.158567	0.0574703	14.2855	0.0539515
Weiyuan	Slope	Agriculture	22	0.00621474	0.0227909	19.3307	0.714247
Weiyuan	Slope	MAP	22	0.00837995	-0.00470097	24.6818	0.670532
Weiyuan	Slope	Forest	22	0.00515367	-0.0206779	21.4392	0.738871
Weiyuan	Slope	Elv	22	0.303295	0.0110303	1.08427	0.0052902
Weiyuan	Relief	Median Ksn	22	0.262159	14.4381	66.3615	0.0105346
Weiyuan	Relief	Agriculture	22	0.0214167	8.26643	1274.57	0.495016
Weiyuan	Relief	MAP	22	0.0274738	-1.6631	3172.41	0.438904
Weiyuan	Relief	Forest	22	0.0287458	-9.54172	2195.01	0.428349
Weiyuan	Relief	Elv	22	0.117244	-1.33997	3748.64	0.101452
Weiyuan	Median Ksn	Agriculture	22	0.00629592	0.158944	93.333	0.712464
Weiyuan	Median Ksn	MAP	22	0.0346173	-0.0662028	164.911	0.384044
Weiyuan	Median Ksn	Forest	22	0.00687353	-0.165463	109.658	0.700133
Weiyuan	Median Ksn	Elv	22	0.265362	0.0714891	-24.6625	0.00999453
Weiyuan	Agriculture	MAP	22	0.527318	-0.128989	155.568	5.88843e-05
Weiyuan	Agriculture	Forest	22	0.993716	-0.993181	99.0634	1.01772e-25
Weiyuan	Agriculture	Elv	22	0.0325117	-0.0124918	44.5996	0.399161
Weiyuan	MAP	Forest	22	0.523371	4.05776	715.762	6.47339e-05
Weiyuan	MAP	Elv	22	0.000138354	-0.00458761	1032.98	0.956498
Weiyuan	Forest	Elv	22	0.0414475	0.0141566	52.1497	0.339999
Nankai	Slope	Relief	13	0.0138349	-0.000960183	16.683	0.676327
Nankai	Slope	Median Ksn	13	0.573785	0.106655	9.07453	0.0010722
Nankai	Slope	Agriculture	13	0.000502086	-0.00230866	15.9781	0.936823
Nankai	Slope	MAP	13	0.0373331	0.0194496	-9.255	0.490223
Nankai	Slope	Forest	13	0.311625	0.0957889	11.768	0.0305644
Nankai	Slope	Grass/shrubland	13	0.120411	-0.0393294	16.6694	0.205095
Nankai	Relief	Median Ksn	13	0.0475431	3.76083	581.958	0.43499
Nankai	Relief	Agriculture	13	0.00116461	0.430719	806.578	0.903898
Nankai	Relief	MAP	13	0.112995	4.14502	-4537.11	0.22058
Nankai	Relief	Forest	13	0.0401476	-4.21175	1003.79	0.473983
Nankai	Relief	Grass/shrubland	13	0.00337183	0.806215	806.491	0.837138
Nankai	Median Ksn	Agriculture	13	0.0632881	-0.184088	70.6955	0.365744
Nankai	Median Ksn	MAP	13	0.0800129	0.202226	-197.545	0.306994
Nankai	Median Ksn	Forest	13	0.405854	0.776387	30.4969	0.0106412
Nankai	Median Ksn	Grass/shrubland	13	0.0252459	-0.127901	66.4572	0.571663
Nankai	Agriculture	MAP	13	0.315239	0.548547	-672.538	0.0294129
Nankai	Agriculture	Forest	13	0.187563	-0.721277	67.7963	0.106842
Nankai	Agriculture	Grass/shrubland	13	0.646365	-0.884408	54.1857	0.000303566
Nankai	MAP	Forest	13	0.0138166	0.200371	1284.37	0.67653
Nankai	MAP	Grass/shrubland	13	0.480511	-0.780499	1308.4	0.00416463
Nankai	Forest	Grass/shrubland	13	0.0340101	-0.121812	45.4704	0.510561
Table S6b: Multiple regressions among parameters mentioned in the manuscript
						Variable 1		Variable 2		Intercept
	Y	Variable 1	Variable 2	degrees of freedom	R2	Slope	p	slope	p	Intercept	p
Weiyuan and Nankai	MAP	Slope	Relief	36	0.69	-25.76	1.23e-05	-0.14	3.98e-05	1769.74	2e-16
